# Supplementary material for: Mitigating Soil Salinity Stress with Gypsum and Bio-Organic Amendments: A Review
Source: MDPI journal article supplement (doi:10.3390/agronomy11091735), 2021-08-29
Supplement: s1 [file s1]

**Supplementary Table S1:** A list of studies that used combined gypsum and bio- and/or organic amendments in mitigating salinity stress.

| Treatments                                                                                                                                                                | Experimental condition      | Reference |
|---------------------------------------------------------------------------------------------------------------------------------------------------------------------------|-----------------------------|-----------|
| Gypsum + Sulfur + PK rock biofertilizer<br>( <i>Bradyrhizobium</i> strains NFB 516 and NFB 700) +<br><i>Acidithiobacillus thiooxidans</i>                                 | Greenhouse (pot experiment) | [1]       |
| Gypsum + Farmyard manure                                                                                                                                                  | Field                       | [2]       |
| Gypsum + Compost                                                                                                                                                          | Field                       | [3]       |
| Gypsum + Water hyacinth compost + Rice straw<br>compost                                                                                                                   | Soil columns                | [4]       |
| Gypsum + Farmyard manure + Humic acid                                                                                                                                     | Field                       | [5]       |
| Gypsum + Organic matter (leucerne hay and green<br>manuring with pasture crops)                                                                                           | Field                       | [6]       |
| Gypsum + Bacteria ( <i>Bacillus subtilis</i> OSU 142 and<br><i>Bacillus megaterium</i> M3) + Fungi ( <i>Aspergillus</i> spp. FS<br>9, 11 and <i>Alternaria</i> spp. FS 8) | Soil columns                | [7]       |
| Gypsum + Compost tea + biochar                                                                                                                                            | Field                       | [8]       |

1. Stamford, N.P., et al., *Effect of gypsum and sulfur with Acidithiobacillus on soil salinity alleviation and on cowpea biomass and nutrient status as affected by PK rock biofertilizer*. Scientia Horticulturae, 2015. **192**: p. 287-292.
2. Ahmed, K., et al., *Gypsum and farm manure application with chiseling improve soil properties and performance of fodder beet under saline-sodic conditions*. International Journal of Agriculture and Biology, 2015. **17**(06): p. 1225-1230.
3. Kitila, K., A. Chala, and M. Workina, *Effect of gypsum and compost application in reclaiming sodic soils at small scale irrigation farm in Bora District of East Shewa Zone, Oromia, Ethiopia*. Agriways, 2020. **08**(01): p. 28-44.
4. Abdel-Fattah, M.K., *Role of gypsum and compost in reclaiming saline-sodic soils*. Journal of Agriculture and Veterinary Science, 2012. **1**(3): p. 30-38.
5. Shaaban, M., M. Abid, and S. Abou, *Amelioration of salt affected soils in rice paddy system by application of organic and inorganic amendments*. Plant Soil Environ, 2013. **59**(5): p. 227-233.
6. Vance, W.H., J.M. Tisdall, and B.M. McKenzie, *Residual effects of surface applications of organic matter and calcium salts on the subsoil of a red-brown earth*. Australian Journal of Experimental Agriculture, 1998. **38**: p. 595-600.
7. Sahin, U., S. Eroğlu, and F. Sahin, *Microbial application with gypsum increases the saturated hydraulic conductivity of saline-sodic soils*. Applied Soil Ecology, 2011. **48**(2): p. 247-250.
8. Bayoumy, M., T. Khalifa, and H. Aboelsoud, *Impact of some organic and inorganic amendments on some soil properties and wheat production under saline-sodic soil* Journal of Soil Science and Agricultural Engineering, 2019. **10**(5): p. 307-313.
