# Supplementary material for: Mitigating Soil Salinity Stress with Gypsum and Bio-Organic Amendments: A Review
Source: MDPI journal article supplement (doi:10.3390/agronomy11091735), 2021-08-29
Supplement: s1 [file s1]

Archive with 1 entries (1 files):
- agronomy-1340405-supplementary.pdf
